# Supplementary material
Source: MDPI journal article supplement (https://www.mdpi.com/2077-0472/14/3/396)
Supplement: s1 [file s1]

Table S1. aw, initial and final moisture and proximal composition of the studied samples, by their altitude.

| Sample     | Water activity (aw) |   |      | Initial Moisture (Mo) wb* |   |      | Final Moisture (Mf) db** |   |      | Ash db  |   |      | Fat db |   |      | Crude Protein db |   |      | Crude Fibre db |   |      | NNE db   |   |      |
|------------|---------------------|---|------|---------------------------|---|------|--------------------------|---|------|---------|---|------|--------|---|------|------------------|---|------|----------------|---|------|----------|---|------|
| Altitude 1 |                     |   |      |                           |   |      |                          |   |      |         |   |      |        |   |      |                  |   |      |                |   |      |          |   |      |
| 1          | 0.42a               | ± | 0.01 | 15.36c                    | ± | 0.16 | 8.21a                    | ± | 0.39 | 3.01bc  | ± | 0.01 | 5.67a  | ± | 0.11 | 16.89c           | ± | 0.04 | 7.87a          | ± | 0.16 | 66.56f   | ± | 0.08 |
| 2          | 0.33cd              | ± | 0.01 | 14.94d                    | ± | 0.11 | 6.50cd                   | ± | 0.07 | 3.08bc  | ± | 0.03 | 5.52a  | ± | 0.15 | 15.83d           | ± | 0.04 | 7.27bc         | ± | 0.12 | 68.30e   | ± | 0.10 |
| 3          | 0.32d               | ± | 0.01 | 14.60e                    | ± | 0.15 | 6.15d                    | ± | 0.15 | 2.74d   | ± | 0.07 | 3.57c  | ± | 0.10 | 17.51ab          | ± | 0.25 | 6.76c          | ± | 0.29 | 69.42bc  | ± | 0.38 |
| 4          | 0.34cd              | ± | 0.00 | 15.04d                    | ± | 0.08 | 7.23b                    | ± | 0.13 | 2.41e   | ± | 0.04 | 4.79b  | ± | 0.19 | 16.02d           | ± | 0.30 | 7.33b          | ± | 0.05 | 69.45b   | ± | 0.10 |
| 5          | 0.36bc              | ± | 0.01 | 15.70b                    | ± | 0.14 | 7.89a                    | ± | 0.06 | 3.53a   | ± | 0.10 | 5.78a  | ± | 0.15 | 17.00bc          | ± | 0.14 | 8.26a          | ± | 0.22 | 65.42g   | ± | 0.11 |
| 6          | 0.35cd              | ± | 0.01 | 16.04a                    | ± | 0.08 | 8.11a                    | ± | 0.09 | 3.15b   | ± | 0.02 | 5.05b  | ± | 0.01 | 14.37e           | ± | 0.03 | 6.94bc         | ± | 0.17 | 70.49a   | ± | 0.18 |
| 7          | 0.35cd              | ± | 0.02 | 14.81de                   | ± | 0.02 | 6.71c                    | ± | 0.15 | 1.19f   | ± | 0.01 | 5.53a  | ± | 0.10 | 14.91e           | ± | 0.18 | 7.87a          | ± | 0.02 | 70.50a   | ± | 0.29 |
| 8          | 0.35cd              | ± | 0.03 | 15.47bc                   | ± | 0.06 | 6.74c                    | ± | 0.03 | 2.97c   | ± | 0.08 | 3.47c  | ± | 0.07 | 17.87a           | ± | 0.41 | 6.81bc         | ± | 0.29 | 68.88cd  | ± | 0.13 |
| 9          | 0.39ab              | ± | 0.01 | 15.05d                    | ± | 0.07 | 6.88bc                   | ± | 0.06 | 3.02bc  | ± | 0.01 | 5.49a  | ± | 0.02 | 16.16d           | ± | 0.10 | 6.79c          | ± | 0.11 | 68.54de  | ± | 0.01 |
| Altitude 2 |                     |   |      |                           |   |      |                          |   |      |         |   |      |        |   |      |                  |   |      |                |   |      |          |   |      |
| 10         | 0.34cd              | ± | 0.02 | 15.12cd                   | ± | 0.05 | 6.75d                    | ± | 0.04 | 3.37ab  | ± | 0.02 | 4.79bc | ± | 0.19 | 15.16f           | ± | 0.17 | 7.24cd         | ± | 0.21 | 69.44de  | ± | 0.25 |
| 11         | 0.41ab              | ± | 0.01 | 16.24a                    | ± | 0.09 | 9.19a                    | ± | 0.30 | 2.86def | ± | 0.00 | 6.03a  | ± | 0.16 | 16.39c           | ± | 0.00 | 6.94de         | ± | 0.11 | 67.78gh  | ± | 0.28 |
| 12         | 0.35c               | ± | 0.01 | 15.01d                    | ± | 0.15 | 6.75d                    | ± | 0.04 | 1.96g   | ± | 0.04 | 3.74de | ± | 0.00 | 16.02d           | ± | 0.25 | 7.02de         | ± | 0.24 | 71.25a   | ± | 0.04 |
| 13         | 0.34ce              | ± | 0.02 | 15.59bc                   | ± | 0.20 | 6.82d                    | ± | 0.25 | 2.61f   | ± | 0.00 | 3.56e  | ± | 0.07 | 17.23b           | ± | 0.02 | 6.82e          | ± | 0.07 | 69.79de  | ± | 0.03 |
| 14         | 0.45a               | ± | 0.02 | 16.09ab                   | ± | 0.14 | 9.40a                    | ± | 0.06 | 2.99cd  | ± | 0.05 | 3.56e  | ± | 0.16 | 15.34ef          | ± | 0.04 | 7.45bc         | ± | 0.10 | 70.65ab  | ± | 0.25 |
| 15         | 0.41ab              | ± | 0.02 | 14.90d                    | ± | 0.20 | 8.00b                    | ± | 0.19 | 2.87de  | ± | 0.00 | 5.79a  | ± | 0.01 | 15.95d           | ± | 0.06 | 7.17cd         | ± | 0.03 | 68.22fg  | ± | 0.05 |
| 16         | 0.32cd              | ± | 0.01 | 15.44cd                   | ± | 0.11 | 7.88b                    | ± | 0.13 | 3.55a   | ± | 0.29 | 4.71c  | ± | 0.16 | 15.19f           | ± | 0.16 | 7.66ab         | ± | 0.09 | 68.90ef  | ± | 0.68 |
| 17         | 0.33cd              | ± | 0.02 | 14.08e                    | ± | 0.06 | 5.59e                    | ± | 0.01 | 3.21bc  | ± | 0.01 | 5.15b  | ± | 0.08 | 17.19b           | ± | 0.12 | 7.49bc         | ± | 0.05 | 66.96h   | ± | 0.16 |
| 18         | 0.37bc              | ± | 0.01 | 15.36cd                   | ± | 0.41 | 7.97b                    | ± | 0.22 | 2.71ef  | ± | 0.02 | 5.11bc | ± | 0.22 | 17.74a           | ± | 0.11 | 6.12f          | ± | 0.07 | 68.32fg  | ± | 0.29 |
| 19         | 0.35c               | ± | 0.01 | 14.30e                    | ± | 0.26 | 6.02e                    | ± | 0.16 | 2.94de  | ± | 0.01 | 3.99d  | ± | 0.07 | 15.69de          | ± | 0.03 | 7.10de         | ± | 0.13 | 70.28bcd | ± | 0.02 |
| 20         | 0.33cd              | ± | 0.03 | 14.95d                    | ± | 0.10 | 7.33c                    | ± | 0.12 | 3.36ab  | ± | 0.04 | 5.62a  | ± | 0.12 | 15.36ef          | ± | 0.14 | 7.89a          | ± | 0.05 | 67.77gh  | ± | 0.18 |
| 21         | 0.30d               | ± | 0.02 | 14.09e                    | ± | 0.10 | 5.89e                    | ± | 0.15 | 2.78def | ± | 0.07 | 3.54e  | ± | 0.24 | 15.89d           | ± | 0.07 | 7.21cd         | ± | 0.04 | 70.58abc | ± | 0.42 |

Mean values ± Standard Deviation. (n=3). For each altitude, values in the same column followed by different letters differ at a significance level of 0.05 according to Tukey's test.

\*wb: wet basis; \*\* db: dry basis.

Mo (g 100 g<sup>-1</sup>); Mf (g 100 g<sup>-1</sup>); Ash (g.100 g<sup>-1</sup>); Fat (g 100 g<sup>-1</sup>); Crude Protein (g 100 g<sup>-1</sup>); Crude Fiber (g 100 g<sup>-1</sup>); NNE: Non- nitrogenous extract (g 100 g<sup>-1</sup>).

Table S1 (Cont.). aw, initial humidity and proximal composition of the studied samples, by their altitude.

| Sample     | Water activity (aw) |   |      | Initial Moisture (Mo) wb* |   |      | Final Moisture (Mf) db** |   |      | Ash db |   |      | Fat db   |   |      | Crude Protein db    |   |      | Crude Fibre db |   |      | NNE db  |   |      |
|------------|---------------------|---|------|---------------------------|---|------|--------------------------|---|------|--------|---|------|----------|---|------|---------------------|---|------|----------------|---|------|---------|---|------|
| Altitude 3 |                     |   |      |                           |   |      |                          |   |      |        |   |      |          |   |      |                     |   |      |                |   |      |         |   |      |
| 22         | 0.38abcd            | ± | 0.00 | 16.20a                    | ± | 0.18 | 8.76b                    | ± | 0.03 | 2.06h  | ± | 0.10 | 5.83bcd  | ± | 0.02 | 14.73g <sub>h</sub> | ± | 0.08 | 8.28ab         | ± | 0.14 | 69.10bc | ± | 0.06 |
| 23         | 0.38bcd             | ± | 0.01 | 15.73bc                   | ± | 0.14 | 7.92e                    | ± | 0.06 | 3.30ab | ± | 0.03 | 5.83bcd  | ± | 0.05 | 17.00b              | ± | 0.24 | 7.17def        | ± | 0.30 | 66.70e  | ± | 0.56 |
| 24         | 0.41ab              | ± | 0.03 | 15.63c                    | ± | 0.12 | 8.19de                   | ± | 0.04 | 2.64g  | ± | 0.04 | 6.94a    | ± | 0.33 | 16.95b <sub>c</sub> | ± | 0.13 | 7.17def        | ± | 0.12 | 66.30e  | ± | 0.30 |
| 25         | 0.40abc             | ± | 0.01 | 15.03d                    | ± | 0.19 | 6.86g                    | ± | 0.06 | 2.54g  | ± | 0.03 | 4.92ef   | ± | 0.14 | 15.84e              | ± | 0.12 | 7.06ef         | ± | 0.38 | 69.64b  | ± | 0.09 |
| 26         | 0.33def             | ± | 0.01 | 14.85de                   | ± | 0.13 | 7.29f                    | ± | 0.20 | 3.33a  | ± | 0.01 | 4.62fg   | ± | 0.08 | 13.86i              | ± | 0.14 | 6.79f          | ± | 0.28 | 71.39a  | ± | 0.06 |
| 27         | 0.26g               | ± | 0.04 | 14.49ef                   | ± | 0.13 | 6.09h                    | ± | 0.10 | 3.20bc | ± | 0.04 | 4.64fg   | ± | 0.17 | 16.46d              | ± | 0.14 | 7.96abc        | ± | 0.18 | 67.74d  | ± | 0.44 |
| 28         | 0.33def             | ± | 0.03 | 14.10f                    | ± | 0.13 | 6.86g                    | ± | 0.05 | 3.06de | ± | 0.03 | 5.66bcd  | ± | 0.27 | 15.17f              | ± | 0.03 | 7.73abcd       | ± | 0.07 | 68.39cd | ± | 0.34 |
| 29         | 0.32ef              | ± | 0.01 | 14.11f                    | ± | 0.07 | 6.78g                    | ± | 0.19 | 2.94ef | ± | 0.00 | 4.94ef   | ± | 0.02 | 15.87e              | ± | 0.13 | 7.18def        | ± | 0.00 | 69.07bc | ± | 0.11 |
| 30         | 0.28fg              | ± | 0.01 | 14.33f                    | ± | 0.09 | 6.01h                    | ± | 0.04 | 3.20bc | ± | 0.01 | 5.36de   | ± | 0.03 | 15.65e              | ± | 0.05 | 7.73abcd       | ± | 0.23 | 68.06d  | ± | 0.24 |
| 31         | 0.42ab              | ± | 0.01 | 15.87abc                  | ± | 0.13 | 8.24cd                   | ± | 0.02 | 3.01de | ± | 0.04 | 5.59cd   | ± | 0.18 | 15.60e              | ± | 0.28 | 7.34def        | ± | 0.02 | 68.46cd | ± | 0.04 |
| 32         | 0.34def             | ± | 0.02 | 15.78abc                  | ± | 0.22 | 8.46bcd                  | ± | 0.05 | 2.84f  | ± | 0.05 | 6.12b    | ± | 0.01 | 17.45a              | ± | 0.19 | 7.65cde        | ± | 0.02 | 65.94e  | ± | 0.22 |
| 33         | 0.35cde             | ± | 0.03 | 14.11f                    | ± | 0.09 | 6.00h                    | ± | 0.01 | 3.26ab | ± | 0.01 | 3.82h    | ± | 0.18 | 16.57c <sub>d</sub> | ± | 0.06 | 6.92f          | ± | 0.38 | 69.43b  | ± | 0.63 |
| 34         | 0.28fg              | ± | 0.03 | 14.20f                    | ± | 0.08 | 6.13h                    | ± | 0.03 | 3.08cd | ± | 0.04 | 5.67bcd  | ± | 0.27 | 14.53h              | ± | 0.08 | 7.68bcd        | ± | 0.10 | 69.03bc | ± | 0.13 |
| 35         | 0.44a               | ± | 0.02 | 16.12abc                  | ± | 0.09 | 9.24a                    | ± | 0.22 | 3.25ab | ± | 0.01 | 5.85bc   | ± | 0.12 | 15.09fg             | ± | 0.02 | 7.95abc        | ± | 0.12 | 67.87d  | ± | 0.20 |
| 36         | 0.34cde             | ± | 0.01 | 15.59c                    | ± | 0.22 | 8.52bc                   | ± | 0.09 | 3.05de | ± | 0.05 | 4.42g    | ± | 0.03 | 15.04fg             | ± | 0.10 | 8.29a          | ± | 0.08 | 69.20bc | ± | 0.09 |
| Altitude 4 |                     |   |      |                           |   |      |                          |   |      |        |   |      |          |   |      |                     |   |      |                |   |      |         |   |      |
| 37         | 0.36abcd            | ± | 0.01 | 14.05fg                   | ± | 0.07 | 5.72fg                   | ± | 0.04 | 2.54g  | ± | 0.04 | 4.92cd   | ± | 0.26 | 16.60b <sub>c</sub> | ± | 0.11 | 6.91def        | ± | 0.08 | 69.03de | ± | 0.11 |
| 38         | 0.26e               | ± | 0.01 | 14.07fg                   | ± | 0.11 | 5.90f                    | ± | 0.44 | 2.21i  | ± | 0.02 | 5.65b    | ± | 0.03 | 14.96d              | ± | 0.04 | 7.62bc         | ± | 0.06 | 69.56cd | ± | 0.01 |
| 39         | 0.35bcd             | ± | 0.01 | 15.05bcd                  | ± | 0.07 | 7.29bcd                  | ± | 0.13 | 3.33a  | ± | 0.03 | 4.35f    | ± | 0.03 | 16.66b <sub>c</sub> | ± | 0.12 | 7.76ab         | ± | 0.08 | 67.91f  | ± | 0.10 |
| 40         | 0.41a               | ± | 0.01 | 14.81d                    | ± | 0.02 | 7.26cd                   | ± | 0.06 | 3.08c  | ± | 0.02 | 5.01c    | ± | 0.16 | 16.58b <sub>c</sub> | ± | 0.04 | 6.56fg         | ± | 0.07 | 68.77e  | ± | 0.21 |
| 41         | 0.40ab              | ± | 0.01 | 15.15bc                   | ± | 0.10 | 7.75b                    | ± | 0.12 | 2.84e  | ± | 0.03 | 5.09c    | ± | 0.05 | 17.97a              | ± | 0.24 | 6.30g          | ± | 0.12 | 67.81fg | ± | 0.34 |
| 42         | 0.35bcd             | ± | 0.03 | 14.45e                    | ± | 0.10 | 7.17cd                   | ± | 0.15 | 2.44h  | ± | 0.03 | 4.72cdef | ± | 0.06 | 14.95d              | ± | 0.10 | 7.18de         | ± | 0.20 | 70.72a  | ± | 0.13 |
| 43         | 0.28e               | ± | 0.00 | 14.86cd                   | ± | 0.07 | 6.66e                    | ± | 0.24 | 3.27ab | ± | 0.00 | 4.73cdef | ± | 0.10 | 16.69b <sub>c</sub> | ± | 0.08 | 6.80ef         | ± | 0.18 | 68.50e  | ± | 0.19 |
| 44         | 0.35cd              | ± | 0.01 | 14.32ef                   | ± | 0.18 | 6.94de                   | ± | 0.05 | 2.98d  | ± | 0.00 | 4.83cde  | ± | 0.25 | 16.45c              | ± | 0.22 | 6.69fg         | ± | 0.25 | 69.05de | ± | 0.22 |
| 45         | 0.34d               | ± | 0.03 | 15.20b                    | ± | 0.05 | 7.62bc                   | ± | 0.03 | 2.80ef | ± | 0.05 | 5.93ab   | ± | 0.17 | 15.15d              | ± | 0.18 | 6.74f          | ± | 0.20 | 69.38d  | ± | 0.16 |
| 46         | 0.40abc             | ± | 0.01 | 15.65a                    | ± | 0.12 | 8.42a                    | ± | 0.04 | 3.19b  | ± | 0.03 | 6.13a    | ± | 0.10 | 15.35d              | ± | 0.23 | 8.08a          | ± | 0.19 | 67.26g  | ± | 0.11 |

|           |        |        |         |        |        |        |        |        |         |        |                     |        |         |        |         |        |
|-----------|--------|--------|---------|--------|--------|--------|--------|--------|---------|--------|---------------------|--------|---------|--------|---------|--------|
| <b>47</b> | 0.35cd | ± 0.03 | 15.15bc | ± 0.04 | 7.06de | ± 0.02 | 2.88de | ± 0.04 | 3.43g   | ± 0.16 | 16.80b <sub>c</sub> | ± 0.00 | 6.84def | ± 0.06 | 70.03bc | ± 0.18 |
| <b>48</b> | 0.33d  | ± 0.01 | 15.12bc | ± 0.05 | 7.54bc | ± 0.01 | 2.95d  | ± 0.03 | 4.59def | ± 0.06 | 16.96b              | ± 0.07 | 7.61bc  | ± 0.08 | 67.90f  | ± 0.18 |
| <b>49</b> | 0.28e  | ± 0.02 | 13.91g  | ± 0.20 | 5.40g  | ± 0.06 | 2.73f  | ± 0.04 | 4.51ef  | ± 0.02 | 15.26d              | ± 0.23 | 7.25cd  | ± 0.03 | 70.25ab | ± 0.32 |

Mean values ± Standard Deviation. (n=3). For each altitude, values in the same column followed by different letters differ at a significance level of 0.05 according to Tukey's test.

\*wb: wet basis; \*\* db: dry basis.

Mo (g 100 g<sup>-1</sup>); Mf (g 100 g<sup>-1</sup>); Ash (g 100 g<sup>-1</sup>); Fat (g 100 g<sup>-1</sup>); Crude Protein (g 100 g<sup>-1</sup>); Crude Fiber (g 100 g<sup>-1</sup>); NNE: Non- nitrogenous extract (g 100 g<sup>-1</sup>).

Table S2. Mineral composition of the studied samples, by altitude range.

| Sample            | Ca           | P               | Mg             | K              | Na           | Cu          | Fe          | Mn          | Zn          |
|-------------------|--------------|-----------------|----------------|----------------|--------------|-------------|-------------|-------------|-------------|
| <b>Altitude 1</b> |              |                 |                |                |              |             |             |             |             |
| 1                 | 49.44±5.23b  | 719.59±4.71a    | 194.78±0.71bcd | 795.35±7.29b   | 2.33±0.05bc  | 0.38±0.05bc | 4.44±0.12c  | 0.7±0.06cd  | 3.3±0.06a   |
| 2                 | 34.67±1.25e  | 457.95±21.15e   | 186.37±5.26d   | 899.92±26.33a  | 1.44±0.05ef  | 0.32±0.01c  | 3.78±0.16de | 0.64±0.01d  | 3.35±0.05a  |
| 3                 | 42.67±0.49d  | 520.13±10.25cd  | 191.07±0.27bcd | 753.66±1.08cd  | 1.59±0.01e   | 0.37±0.05bc | 4.41±0.16c  | 0.64±0.01d  | 3.29±0.11a  |
| 4                 | 48.68±0.37bc | 546.86±11.05bcd | 198.37±5.48bc  | 782.76±0.92bc  | 1.98±0.05d   | 0.54±0.01a  | 5.2±0.16a   | 0.86±0.01b  | 3.22±0.01ab |
| 5                 | 60.69±0.31a  | 544.85±5.23bcd  | 221.17±5.33a   | 749.84±5.65cd  | 2.21±0.05c   | 0.32±0.01c  | 3.45±0.01f  | 0.76±0.01c  | 2.64±0.05c  |
| 6                 | 58.38±0.17a  | 513.51±16.01d   | 194.59±0.17bcd | 745.95±0.65d   | 2.54±0.16b   | 0.54±0.01a  | 3.51±0.05ef | 1.3±0.01a   | 3.3±0.05a   |
| 7                 | 50.21±0.12b  | 416.18±0.58f    | 170.74±0.24e   | 805.68±4.88b   | 3.09±0.11a   | 0.43±0.01b  | 3.95±0.11d  | 1.23±0.05a  | 2.72±0.06c  |
| 8                 | 41.79±0.17d  | 549.73±16.1bc   | 208.15±5.37b   | 789.9±21.47b   | 1.33±0.05f   | 0.21±0.01d  | 4.8±0.01b   | 0.64±0.01d  | 3.26±0.05ab |
| 9                 | 43.55±0.29cd | 555.75±10.54b   | 197.72±5.29bcd | 689.35±5.17e   | 1.92±0.01d   | 0.43±0.01b  | 3.9±0.05d   | 0.69±0.05cd | 3.1±0.01b   |
| <b>Altitude 2</b> |              |                 |                |                |              |             |             |             |             |
| 10                | 40.89±0.63d  | 528.43±16.1d    | 224.18±0.08b   | 854.03±10.82a  | 1.6±0.11e    | 0.37±0.05bc | 4.27±0.01ef | 0.75±0bc    | 2.99±0.01de |
| 11                | 47.22±1.02c  | 600.55±1.67ab   | 212.92±5.2cd   | 693.37±6.63e   | 2.51±0.01bc  | 0.27±0.05ef | 4.48±0.01de | 0.86±0.12b  | 3.49±0.01b  |
| 12                | 41.1±0.09d   | 555.1±10.76cd   | 202.83±0.08de  | 784.61±5.51    | 1.23±0.16f   | 0.32±0.01de | 4.86±0.16c  | 0.69±0.05c  | 3.1±0.11cde |
| 13                | 47.69±0.48c  | 453.97±5.95e    | 170.9±0.4f     | 699.64±4.74ec  | 2.3±0.06cd   | 0.64±0.01b  | 5.23±0.1b   | 1.01±0.05a  | 3.26±0.05c  |
| 14                | 56.39±0.41b  | 568.87±22.03bc  | 246.14±5.54a   | 836.89±5.25ab  | 2.08±0.01d   | 0.77±0.01a  | 3.83±0.11g  | 0.66±0.01c  | 3.83±0.11a  |
| 15                | 47.3±0.02c   | 566.98±5.99bc   | 221.39±5.21bc  | 631.76±15.66f  | 2.21±0.06d   | 0.16±0.05g  | 4.1±0.01f   | 0.67±0.03c  | 2.92±0.01e  |
| 16                | 62.95±0.30a  | 609.51±15.81a   | 199.58±5.53e   | 830.67±11.37ab | 2.1±0.06d    | 0.27±0.05ef | 4.75±0.11c  | 0.49±0.05d  | 3.29±0.06bc |
| 17                | 55.96±0.96b  | 586±5.25abc     | 221.73±0.02bc  | 818.29±5.24b   | 2.59±0.05b   | 0.32±0.01de | 4.7±0.05cd  | 0.74±0.01bc | 2.16±0.16f  |
| 18                | 57.12±1.2b   | 610.01±15.62a   | 199.74±5.21e   | 620.82±6.14f   | 2.32±0.16bcd | 0.43±0.01c  | 5.61±0.01a  | 0.74±0.03bc | 3.94±0.05a  |
| 19                | 42.36±0.2d   | 524.81±5.74d    | 180.24±0.27f   | 758.06±5.95d   | 1.48±0.01ef  | 0.32±0.01de | 4.29±0.05ef | 0.69±0.05c  | 3.02±0.05de |
| 20                | 59.03±5.09ab | 574.19±15.81abc | 203.92±0.23de  | 756.65±5.02d   | 3.81±0.16a   | 0.21±0.01fg | 2.79±0.01h  | 0.64±0.01c  | 2.68±0.01f  |
| 21                | 55.96±0.96c  | 586±5.25e       | 221.73±0.02e   | 818.29±5.24d   | 2.59±0.05f   | 0.32±0.01fg | 4.7±0.05g   | 0.74±0.01bc | 2.16±0.16cd |

Mean values ± Standard Deviation. (n=3). For each altitude, values in the same column followed by different letters differ at a significance level of 0.05 according to Tukey's test.

Mineral content expressed on mg100 g<sup>-1</sup> dry basis.

Table S2. (Cont.). Mineral composition of the studied samples, by their altitude.

| Sample            | Ca                      | P               | Mg                        | K                       | Na                     | Cu                     | Fe                     | Mn                     | Zn                     |
|-------------------|-------------------------|-----------------|---------------------------|-------------------------|------------------------|------------------------|------------------------|------------------------|------------------------|
| <b>Altitude 3</b> |                         |                 |                           |                         |                        |                        |                        |                        |                        |
| 22                | 57.1±2.41b              | 565.57±0.15bc   | 222.96±5.41ab             | 837.47±0.23ab           | 3.86±0.05 <sup>a</sup> | 0.16±0.05e             | 3.97±0.16c             | 0.65±0.01cdef          | 3.1±0.16cdef           |
| 23                | 56.87±0.62bc            | 539.61±0.29def  | 188.86±5.45efg            | 820.2±11.02bc           | 3.18±0.16bc            | 0.32±0.01bcd           | 3.99±0.11c             | 0.59±0.05efg           | 3.08±0.05cdef          |
| 24                | 52.9±0.89bc             | 524.7±5.52ef    | 194.73±0.07def            | 762.71±5.25gh           | 2.43±0.27ef            | 0.32±0.01bcd           | 4.27±0.05b             | 0.54±0.01fgh           | 3.41±0.16bc            |
| 25                | 48.35±0.3d              | 443.46±5.47i    | 192.34±0.11ef             | 726.63±0.43i            | 3.47±0.16ab            | 0.21±0.01de            | 5.08±0.16 <sup>a</sup> | 0.64±0.01defg          | 3.37±0.05bcd           |
| 26                | 54.5±0.32bcd            | 552.53±4.94de   | 209.22±5.56c              | 793.94±1.49de           | 3.22±0.01bc            | 0.32±0.11bcd           | 2.84±0.05fg            | 0.54±0.01gh            | 2.57±0.11g             |
| 27                | 66.09±0.28a             | 525.15±5.57def  | 228.09±5.42 <sup>a</sup>  | 747.93±4.99g            | 2.81±0.16cde           | 0.21±0.01de            | 3.5±0.01d              | 0.48±0.05h             | 2.76±0.1fg             |
| 28                | 54.23±0.03bcd           | 625.11±15.86a   | 213.71±0.1bc              | 764.03±5.55fgh          | 2.4±0.27ef             | 0.43±0.01b             | 4.27±0.01b             | 0.77±0.08c             | 3.21±0.11bcde          |
| 29                | 48.37±0.02d             | 528.57±5.88def  | 186.86±5.18fg             | 763.48±4.8fgh           | 1.28±0.01g             | 0.37±0.05bc            | 4.38±0.01b             | 0.62±0.03defg          | 3.58±0.06ab            |
| 30                | 63.82±0.34a             | 577.78±5.43b    | 206.73±5.35cd             | 784.51±10.44ef          | 2.17±0.26f             | 0.58±0.05 <sup>a</sup> | 3.6±0.11d              | 1.06±0.01ab            | 2.86±0.21efg           |
| 31                | 54.88±0.12bcd           | 487.06±10.77gh  | 167.77±5.39i              | 833.42±0.18ab           | 3.14±0.01bc            | 0.22±0.01de            | 3.03±0.01ef            | 1.08±0.01a             | 3.9±0.22 <sup>a</sup>  |
| 32                | 48.54±4.18d             | 471.79±37.82Mo  | 178.96±5.37Mo             | 835.14±11.12ab          | 2.17±0.01f             | 0.22±0.01de            | 3.42±0.06d             | 0.6±0.05defg           | 2.93±0.22efg           |
| 33                | 38.05±0.43cd            | 561.8±10.57d    | 212±0.02bc                | 779.1±5.26efg           | 1.17±0.11a             | 0.21±0.01de            | 3.55±0.05d             | 0.53±0.01gh            | 3.13±0.05cdef          |
| 34                | 63.79±0.62 <sup>a</sup> | 573.13±0.18bc   | 201.66±0.06cde            | 758.86±5.43gh           | 3.77±0.05g             | 0.42±0.01b             | 2.76±0.01g             | 0.96±0.01b             | 3.56±0.05ab            |
| 35                | 51.89±1.42e             | 573.5±6.12bc    | 202.09±5.28cde            | 808.36±10.24cd          | 3±0.06cd               | 0.38±0.06bc            | 3.5±0.01d              | 0.71±0.06cd            | 3.22±0.05bcde          |
| 36                | 53.39±0.82bcd           | 510.06±11.05fg  | 200.77±5.5cde             | 846.47±10.54a           | 2.6±0.11def            | 0.27±0.05cde           | 3.15±0.01e             | 0.71±0.05cde           | 2.98±0.06cdef          |
| <b>Altitude 4</b> |                         |                 |                           |                         |                        |                        |                        |                        |                        |
| 37                | 44.24±0.07f             | 502.17±5.4gh    | 185.01±5.33e              | 729.47±10.73e           | 2.7±0.05b              | 0.21±0.01ef            | 3.96±0.05fg            | 0.63±0.01def           | 2.8±0.05h              |
| 38                | 55.92±0.34bc            | 577.18±17.24cde | 227.68±4.9 <sup>a</sup>   | 826.03±12.68b           | 2.59±0.05bc            | 0.53±0.01ab            | 4.5±0.05de             | 0.85±0.01ab            | 3.12±0.17fg            |
| 39                | 56.92±0.02ab            | 536.47±11.08fg  | 193.13±10.85cd            | 852.97±4.9 <sup>a</sup> | 3.27±0.05 <sup>a</sup> | 0.43±0.11bc            | 4.77±0.06ab            | 0.75±0.01bc            | 3.33±0.01cde           |
| 40                | 46.39±0.03e             | 611.37±0.36abc  | 209.15±5.43abc            | 761.53±0.45d            | 2.36±0cd               | 0.54±0.01ab            | 5.04±0.11 <sup>a</sup> | 0.73±0.08bcd           | 3.11±0.01fg            |
| 41                | 34.64±0.01g             | 635.73±10.45a   | 199.34±5.5cd              | 727.32±5.82e            | 1.94±0.01ef            | 0.59±0.05 <sup>a</sup> | 4.74±0.01bc            | 0.54±0.01fg            | 3.99±0.11 <sup>a</sup> |
| 42                | 43.99±0.01f             | 551.93±16.46df  | 225.05±10.56 <sup>a</sup> | 723.4±5.92e             | 1.29±0.11h             | 0.11±0.00f             | 4.13±0.06f             | 0.54±0.01fg            | 3±0.01g                |
| 43                | 44.75±0.26f             | 570.65±6.1def   | 191.99±0.44cd             | 773.3±4.68cd            | 3.52±0.11 <sup>a</sup> | 0.37±0.05cd            | 3.84±0.01g             | 0.59±0.05fg            | 3.2±0.01def            |
| 44                | 55.55±0.08c             | 566.76±10.58def | 203.18±10.65bcd           | 721.82±5.2e             | 2.19±0.05de            | 0.43±0.01bc            | 4.44±0.05e             | 0.91±0.05 <sup>a</sup> | 3.48±0.05bc            |
| 45                | 50.37±0.23d             | 629.58±16.24ab  | 172.19±0.06e              | 791±5.26c               | 2.26±0.01d             | 0.43±0.01bc            | 3.07±0.05i             | 0.54±0.11fg            | 3.66±0b                |
| 46                | 51.07±1.1d              | 590.91±16.17cd  | 222.27±5.46ab             | 786.08±5.3c             | 2.55±0.16bc            | 0.43±0.01bc            | 3.74±0.27g             | 0.6±0.05efg            | 3.42±0.05c             |
| 47                | 55.35±0.12c             | 551.35±5.44df   | 203.41±0.03bcd            | 690.53±5.24f            | 1.61±0.11g             | 0.16±0.05ef            | 3.69±0.05g             | 0.48±0.05f             | 3.37±0.05cd            |
| 48                | 57.16±0.05 <sup>a</sup> | 596.84±16.16cd  | 198.95±5.39cd             | 811.92±5.42b            | 2.37±0.22cd            | 0.22±0.01ef            | 3.39±0.05h             | 0.75±0.01bc            | 3.17±0.05dfg           |
| 49                | 56.07±0.14bc            | 495.38±0.29h    | 194.99±5.21cd             | 669.29±5.07g            | 1.84±0.05fg            | 0.26±0.05de            | 4.16±0.05f             | 0.74±0.01bcd           | 3.21±0.05def           |

Mean values ± Standard Deviation. (n=3). For each altitude, values in the same column followed by different letters differ at a significance level of 0.05 according to Tukey's test.

Mineral content expressed in mg100 g<sup>-1</sup> dry basis.

Table S3. Antioxidant Activity and antioxidant compounds of the studied samples, by their altitude, expressed on dry basis.

| Sample     | AA ABTS |   |      | AA FRAP            |   |      | TPC       |   |      | TFC     |        |
|------------|---------|---|------|--------------------|---|------|-----------|---|------|---------|--------|
| Altitude 1 |         |   |      |                    |   |      |           |   |      |         |        |
| 1          | 40.47ab | ± | 0.26 | 23.12b             | ± | 1.32 | 1.96abc   | ± | 0.01 | 1.39    | ± 0.11 |
| 2          | 39.80ab | ± | 0.49 | 13.45f             | ± | 0.19 | 2.05a     | ± | 0.01 | 1.28    | ± 0.05 |
| 3          | 34.80c  | ± | 0.91 | 14.74ef            | ± | 0.37 | 1.83de    | ± | 0.06 | 1.11    | ± 0.05 |
| 4          | 39.69ab | ± | 0.54 | 17.58c             | ± | 1.28 | 1.87bcde  | ± | 0.03 | 1.46    | ± 0.51 |
| 5          | 40.70ab | ± | 1.21 | 18.80c             | ± | 0.93 | 1.76e     | ± | 0.06 | 1.42    | ± 0.29 |
| 6          | 39.01ab | ± | 0.88 | 23.43b             | ± | 0.15 | 1.85cde   | ± | 0.01 | 1.12    | ± 0.10 |
| 7          | 40.08ab | ± | 1.74 | 29.39 <sup>a</sup> | ± | 0.25 | 1.98ab    | ± | 0.03 | 1.48    | ± 0.09 |
| 8          | 37.48bc | ± | 1.02 | 15.52de            | ± | 0.05 | 1.88bcd   | ± | 0.05 | 1.11    | ± 0.02 |
| 9          | 42.66a  | ± | 3.30 | 16.94cd            | ± | 0.20 | 2.01a     | ± | 0.05 | 0.96    | ± 0.12 |
| Altitude 2 |         |   |      |                    |   |      |           |   |      |         |        |
| 10         | 46.20a  | ± | 4.19 | 16.26de            | ± | 0.13 | 2.13a     | ± | 0.03 | 1.25abc | ± 0.07 |
| 11         | 42.93ab | ± | 1.11 | 16.40de            | ± | 0.14 | 1.94bcd   | ± | 0.05 | 0.92d   | ± 0.10 |
| 12         | 36.53c  | ± | 0.49 | 13.16fg            | ± | 0.48 | 1.87cdef  | ± | 0.01 | 1.25abc | ± 0.13 |
| 13         | 34.46c  | ± | 0.06 | 12.47g             | ± | 0.03 | 1.78defg  | ± | 0.03 | 1.04cd  | ± 0.01 |
| 14         | 42.39ab | ± | 0.56 | 24.67a             | ± | 1.66 | 2.07ab    | ± | 0.04 | 1.48a   | ± 0.07 |
| 15         | 42.97ab | ± | 2.83 | 18.10cd            | ± | 0.28 | 1.97abc   | ± | 0.12 | 1.09bcd | ± 0.08 |
| 16         | 43.51ab | ± | 1.96 | 21.88b             | ± | 0.32 | 1.95bc    | ± | 0.02 | 1.26abc | ± 0.06 |
| 17         | 39.04bc | ± | 1.33 | 15.49ef            | ± | 0.06 | 1.76fg    | ± | 0.10 | 1.32ab  | ± 0.12 |
| 18         | 36.39c  | ± | 0.72 | 19.62bc            | ± | 1.46 | 1.64g     | ± | 0.01 | 0.91d   | ± 0.01 |
| 19         | 34.86c  | ± | 0.42 | 14.74efg           | ± | 0.46 | 1.91bcdef | ± | 0.03 | 1.05cd  | ± 0.02 |
| 20         | 42.92ab | ± | 0.95 | 21.00b             | ± | 0.45 | 1.77efg   | ± | 0.06 | 1.27abc | ± 0.15 |
| 21         | 37.19c  | ± | 1.09 | 16.10de            | ± | 1.92 | 1.93bcde  | ± | 0.09 | 1.06bcd | ± 0.07 |

Mean values ± Standard Deviation. (n=3). For each altitude, values in the same column followed by different letters differ at a significance level of 0.05 according to Tukey's test. AA ABTS: Antioxidant Activity (μmol Trolox equivalent g<sup>-1</sup>); AA FRAP: Antioxidant Activity (μmol Trolox equivalent g<sup>-1</sup>); TPC: Total Phenolic Compounds (mg GAE g<sup>-1</sup>); TFC: Total Flavonoids Compounds (mg of Catechin equivalent g<sup>-1</sup>).

**Table S3.** (Cont.) Antioxidant Activity and antioxidant compounds of the studied samples, by their altitude, expressed on dry basis.

| Sample     | AA ABTS   |   |      | AA FRAP  |   |      | TPC      |   |      | TFC      |   |      |
|------------|-----------|---|------|----------|---|------|----------|---|------|----------|---|------|
| Altitude 3 |           |   |      |          |   |      |          |   |      |          |   |      |
| 22         | 43.32a    | ± | 0.55 | 15.96f   | ± | 0.16 | 1.96a    | ± | 0.06 | 1.60ab   | ± | 0.15 |
| 23         | 38.71bcd  | ± | 1.50 | 16.41ef  | ± | 0.71 | 1.65e    | ± | 0.05 | 1.07de   | ± | 0.07 |
| 24         | 37.83cd   | ± | 1.98 | 19.09cde | ± | 0.47 | 1.85abcd | ± | 0.06 | 1.41abcd | ± | 0.03 |
| 25         | 38.05cd   | ± | 0.96 | 16.23ef  | ± | 0.90 | 1.81abc  | ± | 0.05 | 1.12de   | ± | 0.04 |
| 26         | 38.74bcd  | ± | 0.98 | 19.65cd  | ± | 0.67 | 1.90abc  | ± | 0.02 | 1.46abc  | ± | 0.14 |
| 27         | 36.64d    | ± | 1.25 | 15.50f   | ± | 1.97 | 1.73de   | ± | 0.04 | 1.25cde  | ± | 0.19 |
| 28         | 38.82bcd  | ± | 0.51 | 17.41def | ± | 0.55 | 1.84abcd | ± | 0.03 | 1.04e    | ± | 0.05 |
| 29         | 40.13abcd | ± | 0.78 | 16.47ef  | ± | 1.43 | 1.81bcd  | ± | 0.05 | 1.10de   | ± | 0.05 |
| 30         | 37.61d    | ± | 0.76 | 15.13f   | ± | 0.10 | 1.79cd   | ± | 0.04 | 1.02e    | ± | 0.11 |
| 31         | 41.35abc  | ± | 0.79 | 30.15a   | ± | 1.77 | 1.98a    | ± | 0.03 | 1.30bcde | ± | 0.08 |
| 32         | 39.92abcd | ± | 2.38 | 20.24cd  | ± | 0.66 | 1.95ab   | ± | 0.06 | 1.32bcde | ± | 0.16 |
| 33         | 39.07bcd  | ± | 1.67 | 17.53def | ± | 0.59 | 1.93abc  | ± | 0.08 | 1.25cde  | ± | 0.03 |
| 34         | 39.55bcd  | ± | 0.90 | 24.20b   | ± | 0.61 | 1.92abc  | ± | 0.04 | 1.20cde  | ± | 0.15 |
| 35         | 40.22abcd | ± | 0.50 | 21.68bc  | ± | 1.29 | 1.94ab   | ± | 0.05 | 1.71a    | ± | 0.15 |
| 36         | 42.20ab   | ± | 0.65 | 15.01f   | ± | 0.32 | 1.88abc  | ± | 0.04 | 1.52abc  | ± | 0.12 |
| Altitude 4 |           |   |      |          |   |      |          |   |      |          |   |      |
| 37         | 42.29a    | ± | 1.32 | 15.65cde | ± | 0.22 | 2.14a    | ± | 0.07 | 1.15abc  | ± | 0.07 |
| 38         | 39.08abcd | ± | 1.28 | 15.38cde | ± | 1.26 | 2.03ab   | ± | 0.05 | 1.38a    | ± | 0.13 |
| 39         | 42.03a    | ± | 0.47 | 14.12def | ± | 0.19 | 1.77de   | ± | 0.05 | 0.92bc   | ± | 0.04 |
| 40         | 36.70cd   | ± | 0.56 | 16.21cd  | ± | 0.06 | 1.68e    | ± | 0.03 | 1.00bc   | ± | 0.06 |
| 41         | 37.32bcd  | ± | 1.58 | 14.32def | ± | 0.28 | 1.70e    | ± | 0.07 | 0.85c    | ± | 0.04 |
| 42         | 41.25ab   | ± | 0.92 | 12.98f   | ± | 0.25 | 1.89bcde | ± | 0.17 | 1.13abc  | ± | 0.08 |
| 43         | 37.10bcd  | ± | 1.93 | 23.04a   | ± | 1.54 | 1.82bcde | ± | 0.01 | 1.23ab   | ± | 0.01 |
| 44         | 39.02abcd | ± | 2.07 | 14.52def | ± | 0.22 | 1.78de   | ± | 0.02 | 1.20ab   | ± | 0.33 |
| 45         | 37.44bcd  | ± | 0.85 | 14.07ef  | ± | 0.46 | 1.88bcde | ± | 0.11 | 1.36a    | ± | 0.07 |
| 46         | 36.97bcd  | ± | 3.17 | 19.77b   | ± | 0.03 | 1.93abcd | ± | 0.02 | 1.23ab   | ± | 0.01 |
| 47         | 34.87d    | ± | 0.14 | 16.19cde | ± | 0.03 | 1.77de   | ± | 0.05 | 1.00bc   | ± | 0.00 |
| 48         | 43.17a    | ± | 0.59 | 17.33c   | ± | 1.48 | 1.79cde  | ± | 0.05 | 0.95bc   | ± | 0.12 |
| 49         | 39.50abc  | ± | 1.62 | 12.45f   | ± | 0.15 | 2.00abc  | ± | 0.10 | 1.21ab   | ± | 0.05 |

Mean values ± Standard Deviation. (n=3). For each altitude, values in the same column followed by different letters differ at a significance level of 0.05 according to Tukey's test.

AA ABTS: Antioxidant Activity ( $\mu\text{mol Trolox equivalent g}^{-1}$ ); AA FRAP: Antioxidant Activity ( $\mu\text{mol Trolox equivalent g}^{-1}$ ); TPC: Total Phenolic Compounds ( $\text{mg GAE g}^{-1}$ ); TFC: Total Flavonoids Compounds ( $\text{mg of Catechin equivalent g}^{-1}$ ).
